# Supplementary material
Source: ML conference proceedings conference paper supplement (https://openreview.net/forum?id=zvl2LuLTtgr)
Supplement: supplementary_material [file attachment]

## A Model details

In a standard fully-connected multilayer perceptron (MLP), the input is treated as a whole and input into the first linear layer. It blends all information into the feature of subsequent layers, making it difficult to separate the cause and effects. To highlight the difference between our model and traditional MLP, we plot the detailed model architecture of the COMPASS in Figure. 6.

More specifically, we design an encoder-decoder structure in  $f$ , with  $\mathcal{G}$  as a linear transformation applied to the intermediate features. First, the encoder operates on each dimension of  $\epsilon$  independently to generate features  $z_\epsilon \in \mathbb{R}^{|\mathcal{E}| \times d_z}$ . Then the causal graph is multiplied by the features to generate the inputs for the decoder, i.e.,  $g_\epsilon = z_\epsilon^T \mathcal{G} \in \mathbb{R}^{d_z \times K}$ , where  $d_z$  is the dimension of the feature. Similarly, the action sequence  $\mathbf{a}$  is passed through the encoder and transformation to produce the feature of the action sequence  $g_a \in \mathbb{R}^{d_z \times K}$ . Finally,  $g_\epsilon + g_a$  is passed through the decoder to output the prediction  $\hat{d}_T$ .

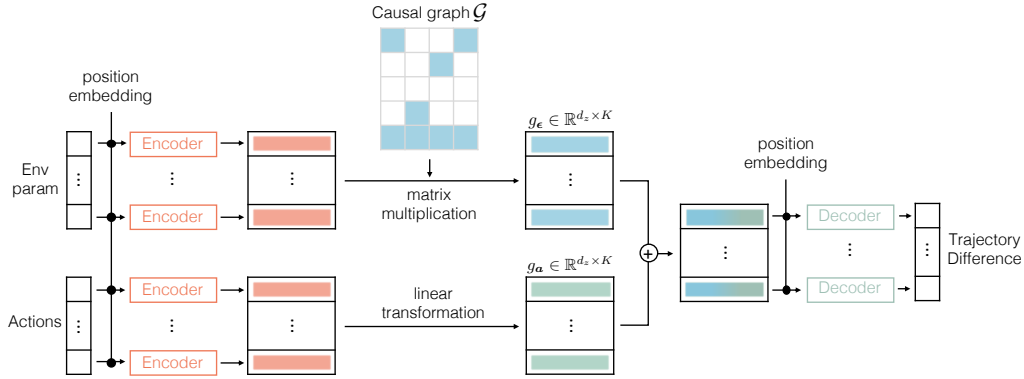

Figure 6: COMPASS model architecture.

## B Experimental Details

### B.1 Experimental Configurations for Robot Simulation Setup

A simulator was developed to mimic a simulated air hockey table with dimensions matching the real-world setup using robosuite [13]. This allowed us to gather rollout trajectories and training data within the simulated environment. The specific dimensions of the objects within the simulation, such as the table size, are detailed in Table 3. Additionally, for the sim-to-sim experiment configuration, default simulation parameters and the ground-truth simulated real environment parameters are presented in Table 4.

**State and action space.** The observation space for the RL agent comprises 6 dimensions. It includes the initial position of puck1 (3D), and the initial position of puck2 (3D). The RL agent’s action space consists of 4 dimensions: the initial position of the pusher in the x-direction, the initial position of the pusher in the y-direction, the shooting angle of the pusher, and the pushing velocity of the pusher. We fixed the initial position of puck1 and puck2. Note that the shooting angle is relative to the line connecting the center of the pusher and puck1.

**Reward function.** The reward is calculated as  $-10 \times \|[x_{puck1}, y_{puck1}, z_{puck1}] - [x_{goal}, y_{goal}, z_{goal}]\|_2$ . To provide additional incentive for reaching the goal, the distance penalty term is divided by 2. Furthermore, a terminal reward is given if the hockey stays within the success region at the last time step. It is important to mention that the reward is not accumulated throughout the horizon. Instead, it only considers the final Euclidean distance between puck2 and the goal center. For further numerical details and specifications, please refer to Table 5.

Table 3: Mujoco Simulation Environment Setup

|                  | X (m)  | Y (m)  | Z (m) | Radius(m)            |
|------------------|--------|--------|-------|----------------------|
| Air hockey table | 0.0    | 0.0    | 0.8   | [0.45, 0.9, 0.035]   |
| Puck1            | -0.15  | 0.0    | 0.8   | 0.0255               |
| Puck2            | -0.075 | -0.075 | 0.8   | 0.0255               |
| Goal point       | 0.43   | 0.0    | 0.8   | 0.15                 |
| Obstacle bar     | 0.1    | 0.0    | 0.8   | [0.025, 0.18, 0.025] |

Table 4: Sim-to-Sim Env Parameters

| Env param                                                              | Default Simulation Env Parameters | Simulated “Real” Env Parameters |
|------------------------------------------------------------------------|-----------------------------------|---------------------------------|
| pusher@actuation@vel_discount                                          | 0.75                              | 0.85                            |
| pusher@dyna@damping                                                    | -10.0                             | -6.0                            |
| puck1@dyna@damping                                                     | -10.0                             | -6.0                            |
| puck1@dyna@friction_sliding                                            | 0.05                              | 0.04                            |
| puck2@dyna@damping                                                     | -10.0                             | -6.0                            |
| puck2@dyna@friction_sliding                                            | 0.05                              | 0.03                            |
| front_wall, back_wall,<br>left_wall, right_wall, obstacle@dyna@damping | -10.0                             | -6.0                            |
| env@camera@bias_x                                                      | 0.0                               | +0.03                           |
| env@camera@bias_y                                                      | 0.0                               | -0.02                           |

## B.2 Experimental Configurations for Real Robot Setup

This is a top-down view of the mini air hockey table we used to collect real trajectories. The dimensional attributes of each component are annotated in Figure 7, while green dashed lines distinctly demarcate the designated goal area. We used Kinova Gen 3 robot platform and ROS [43] to interface with it. We installed a top-down Intel RealSense D345f RGB camera to track the position of puck1 and puck2.

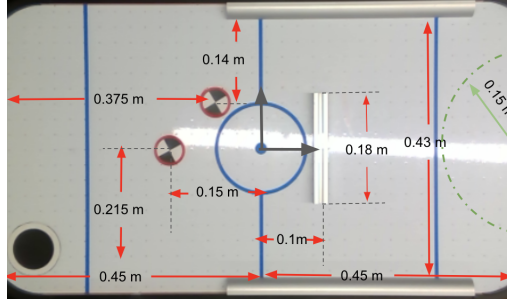

Figure 7: Top-Down View of Table Air Hockey.

## C Implementation Details

We reproduced the baseline implementation EXI-Net [26], NPDR [15] and Tune-Net [24] based on the papers and released code base. We utilized software packages such as PyTorch [44], sbi [45], StableBaseline3 [46], and OpenCV [47]. We report the hyperparameters used for all algorithms,

Table 5: Simulation Environment Setup

| Simulation Parameters |                                                                      |
|-----------------------|----------------------------------------------------------------------|
| Action space          | low: [-0.24, 0.065, -0.157, 0.3]<br>high: [-0.21, 0.085, 0.157, 0.5] |
| Observation space     | low: [-inf] — high:[inf]                                             |
| Terminal reward       | 2.25                                                                 |
| Simulation horizon    | 50 time steps                                                        |
| Simulation timestep   | 0.05 s                                                               |

Table 6: Soft Actor-Critic Hyperparameters

| Parameters Name   | Values      |
|-------------------|-------------|
| learning_rate     | 3e-4        |
| gradient_steps    | 32          |
| batch_size        | 32          |
| train_freq        | 8           |
| ent_coef          | 0.005       |
| net_arch          | [32, 32]    |
| policy            | “MlpPolicy” |
| env_number        | 64          |
| buffer_size       | 1,000,000   |
| learning_starts   | 100         |
| tau               | 0.005       |
| gamma             | 0.99        |
| action_noise      | None        |
| stats_window_size | 100         |

including the proposed COMPASS method, in Table 7, 8, 9, and 10, which provide a comprehensive list of the parameters we utilized to reproduce the results.

**Soft Actor-Critic hyperparameters.** We use SAC implementation in StableBaseline3 [46] to train the RL agents. The training hyperparameter is shown in Table 6.

Table 7: COMPASS hyperparameters

| Description                                                                                  | value          | variable_name        |
|----------------------------------------------------------------------------------------------|----------------|----------------------|
| Shared Hyperparameters                                                                       |                |                      |
| Number of iterations                                                                         | 10             | n_round              |
| Retrain in each iteration<br>(if False, keep using the model trained in the first iteration) | True           | retrain_from_scratch |
| Number of rollouts in each iteration                                                         | 640            | n_samples_per_round  |
| Number of command actions in each iteration                                                  | 10             | n_cmd_action         |
| Number of epochs                                                                             | 4000           | n_epochs             |
| Batch size                                                                                   | 64             | batch_size           |
| Learning rate                                                                                | 0.001          | learning_rate        |
| Algorithm-Specific Hyperparameters                                                           |                |                      |
| Network encoder dimension                                                                    | 32             | emb_dim              |
| Network hidden dimension                                                                     | [256, 256]     | hidden_dim           |
| Causal dimension                                                                             | 32             | causal_dim           |
| Sparsity weight of the loss function                                                         | 0.003          | sparse_weight        |
| Sparsity weight discount                                                                     | 0.5            | sw_discount          |
| Loss function                                                                                | MSE + Sparsity | loss_function        |
| Optimizer                                                                                    | Adam           | optimizer            |

Table 8: EXI-Net hyperparameters

| Description                                                                                  | value      | variable_name        |
|----------------------------------------------------------------------------------------------|------------|----------------------|
| Shared Hyperparameters                                                                       |            |                      |
| Number of iterations                                                                         | 10         | n_round              |
| Retrain in each iteration<br>(if False, keep using the model trained in the first iteration) | True       | retrain_from_scratch |
| Number of rollouts in each iteration                                                         | 640        | n_samples_per_round  |
| Number of command actions in each iteration                                                  | 10         | n_cmd_action         |
| Number of epochs                                                                             | 4000       | n_epochs             |
| Batch size                                                                                   | 64         | batch_size           |
| Learning rate                                                                                | 0.001      | learning_rate        |
| Algorithm-Specific Hyperparameters                                                           |            |                      |
| Network hidden dimension                                                                     | [256, 256] | hidden_dim           |
| Loss function                                                                                | MSE        | loss_function        |
| Optimizer                                                                                    | Adam       | optimizer            |

Table 9: NPDR hyperparameters

| Description                                                                                  | value   | variable_name         |
|----------------------------------------------------------------------------------------------|---------|-----------------------|
| Shared Hyperparameters                                                                       |         |                       |
| Number of iterations                                                                         | 10      | n_round               |
| Retrain in each iteration<br>(if False, keep using the model trained in the first iteration) | True    | retrain_from_scratch  |
| Number of rollouts in each iteration                                                         | 640     | n_samples_per_round   |
| Number of command actions in each iteration                                                  | 10      | n_cmd_action          |
| Algorithm-Specific Hyperparameters                                                           |         |                       |
| Prior distribution type                                                                      | Uniform | prior                 |
| Inference model type                                                                         | maf     | inf_model             |
| Embedding net type                                                                           | LSTM    | embedding_struct      |
| Embedding downsampling factor                                                                | 2       | downsampling_factor   |
| Posterior hidden features                                                                    | 100     | hidden_features       |
| Posterior number of transforms                                                               | 10      | num_transforms        |
| Normalize posterior                                                                          | False   | normalize_posterior   |
| Density estimator training epochs                                                            | 50      | num_epochs            |
| Density estimator training rate                                                              | 3e-4    | learning_rate         |
| Early stop epochs once posterior converge                                                    | 20      | stop_after_epochs     |
| Use combined loss for posterior training                                                     | True    | use_combined_loss     |
| Discard prior samples                                                                        | False   | discard_prior_samples |
| Sampling method                                                                              | MCMC    | sample_with           |
| MCMC thinning factor                                                                         | 2       | thin                  |

Table 10: Tune-Net hyperparameters

| Description                                                                                  | value      | variable_name         |
|----------------------------------------------------------------------------------------------|------------|-----------------------|
| Shared Hyperparameters                                                                       |            |                       |
| Number of iterations                                                                         | 1          | n_round               |
| Retrain in each iteration<br>(if False, keep using the model trained in the first iteration) | False      | retrain_from_scratch  |
| Number of rollouts in each iteration                                                         | 6400       | n_samples_per_round   |
| Number of command actions in each iteration                                                  | 10         | n_cmd_action          |
| Number of epochs                                                                             | 4000       | n_epochs              |
| Batch size                                                                                   | 64         | batch_size            |
| Learning rate                                                                                | 0.001      | learning_rate         |
| Algorithm-Specific Hyperparameters                                                           |            |                       |
| Network input dimension<br>(Pair of Trajectory and Action dimension)                         | (2, 304)   | (dim_pair, dim_state) |
| Network output dimension<br>(Tunable env param dimension)                                    | 64         | dim_zeta              |
| Env param update iteration                                                                   | 10         | K                     |
| Network hidden dimension                                                                     | [256, 256] | hidden_dim            |
| Loss function                                                                                | MSE        | loss_fn               |
| Optimizer                                                                                    | Adam       | optimizer             |
